# Supplementary material for: Sex Differences in Time-Series Changes in Pseudo-R2 Values Regarding Hyperuricemia in Relation to the Kidney Prognosis
Source: PubMed Central journal article supplement (PMC7711484; doi:10.3390/jpm10040248), 2020-11-26
Supplement: jpm-10-00248-s001.pdf [file jpm-10-00248-s001.pdf]

Web appendix to “Sex Differences in Time Series Changes in Pseudo- $R^2$  Values Regarding Hyperuricemia in Relation to the Kidney Prognosis”

Hiroshi Kataoka <sup>1,2</sup>, Mamiko Ohara <sup>3</sup>, Toshio Mochizuki <sup>1,2,\*</sup>, Kazuhiro Iwadoh <sup>4</sup>, Yusuke Ushio <sup>1</sup>, Keiko Kawachi <sup>1</sup>, Kentaro Watanabe <sup>1</sup>, Saki Watanabe <sup>1</sup>, Taro Akihisa <sup>1</sup>, Shiho Makabe <sup>1</sup>, Shun Manabe <sup>1</sup>, Masayo Sato <sup>1</sup>, Naomi Iwasa <sup>1</sup>, Rie Yoshida <sup>1</sup>, Yukako Sawara <sup>1</sup>, Norio Hanafusa <sup>4</sup>, Ken Tsuchiya <sup>4</sup> and Kosaku Nitta <sup>1</sup>

<sup>1</sup> Department of Nephrology, Tokyo Women’s Medical University, Tokyo 162-8666, Japan

<sup>2</sup> Department of Nephrology, Clinical Research Division for Polycystic Kidney Disease, Tokyo Women’s Medical University, Tokyo 162-8666, Japan

<sup>3</sup> Department of Nephrology, Kameda Medical Center, Chiba, 296-8602, Japan

<sup>4</sup> Department of Blood Purification, Tokyo Women’s Medical University, Tokyo 162-8666, Japan

This appendix provides further methodological detail and results for the main paper.

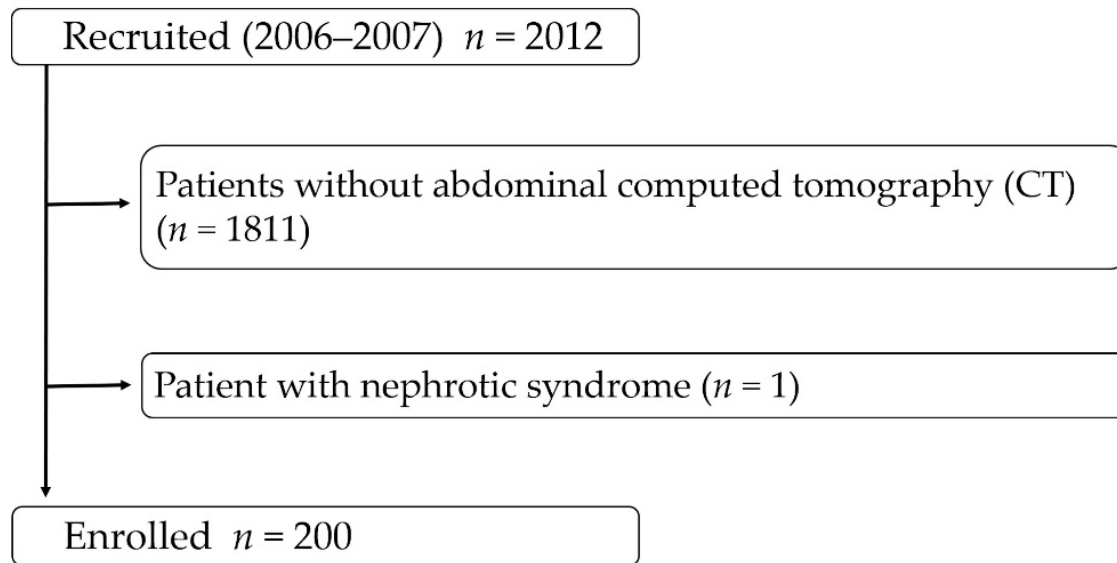

**Supplementary Fig.S1. Patient selection flow chart.** The patient selection flowchart is shown. Among 2012 screened patients, 1811 patients without abdominal computed tomography and 1 patient with nephrotic syndrome are excluded from the study. The remaining 200 patients are enrolled.

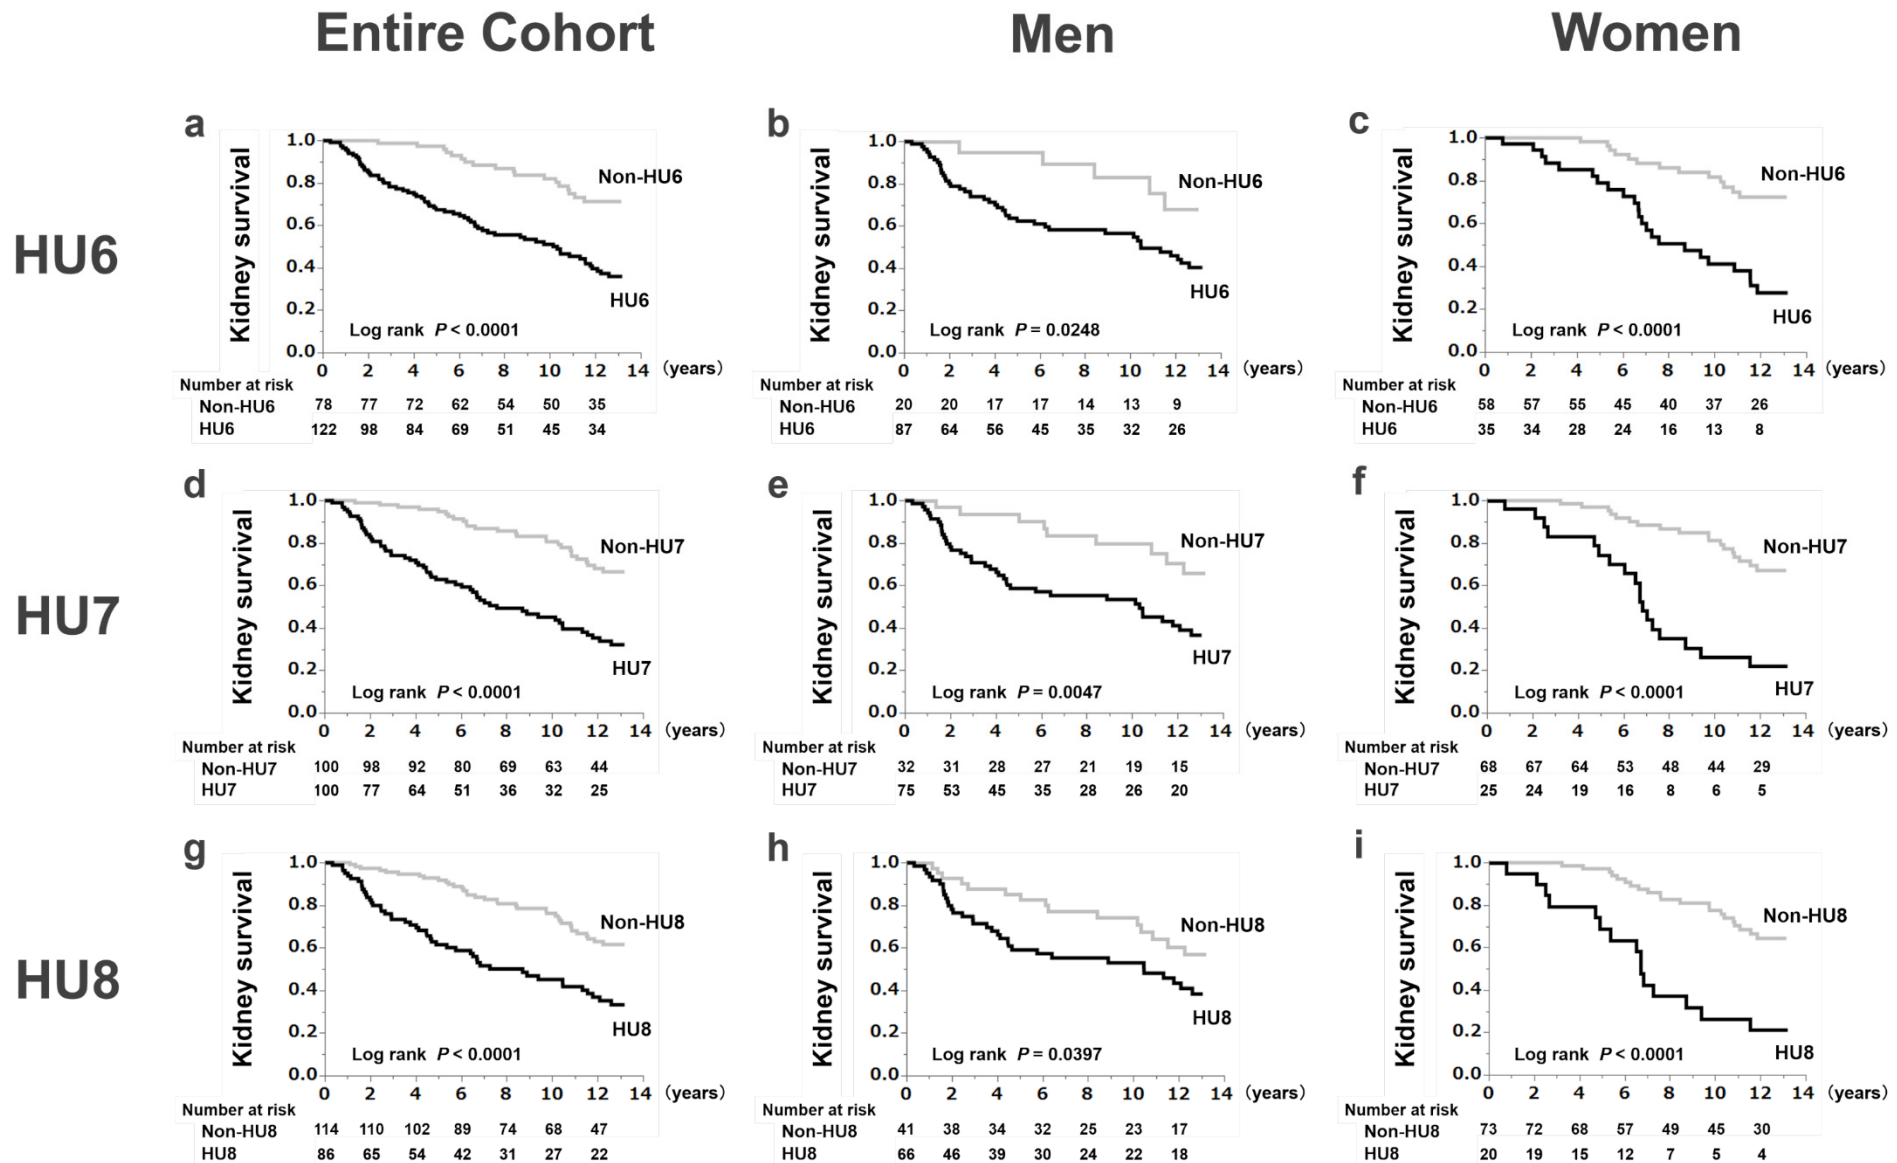

Supplementary Fig. S2. Kaplan–Meier survival curves of the kidney prognosis stratified by HU6, HU7, and HU8 for three cohorts: the entire cohort (a, d, g), men (b, e, h), and women (c, f, i). The kidney prognosis for patients meeting any of the hyperuricemia criteria is poor. Abbreviations: HU6, serum uric acid level  $\geq 6.0$  mg/dL or antihyperuricemic agent use; HU7, serum uric acid level  $\geq 7.0$  mg/dL or antihyperuricemic agent use; HU8, serum uric acid level  $\geq 8.0$  mg/dL or antihyperuricemic agent use;  $P$ , calculated probability.

**Supplementary Table S1.** Patient characteristics according to sex (Cohort without antihyperuricemic agents:  $n = 122$ ).

| Variables                                      | Entire Cohort           | Men               | Women             | P-Value |
|------------------------------------------------|-------------------------|-------------------|-------------------|---------|
|                                                | $n = 122$               | $n = 47$          | $n = 75$          |         |
| <i>Clinical and Laboratory Findings</i>        |                         |                   |                   |         |
| Age (years)                                    | 58.8 ± 13.7 [122]       | 59.3 ± 14.5       | 58.5 ± 13.3       | 0.7494  |
| Sex (Men; %)                                   | 47 (38.5) [122]         | 47 (100.0)        | 0 (0.0)           | <0.0001 |
| MBP (mmHg)                                     | 92.4 ± 6.5 [122]        | 94.1 ± 6.1        | 91.4 ± 6.5        | 0.0263  |
| BMI (kg/m <sup>2</sup> )                       | 23.8 ± 4.1 [122]        | 24.3 ± 3.5        | 23.5 ± 4.5        | 0.3004  |
| Visceral fat area (cm <sup>2</sup> )           | 115.7 ± 61.5 [122]      | 142.1 ± 69.6      | 99.1 ± 49.5       | 0.0001  |
| Visceral fat area 100 cm <sup>2</sup> (vs. no) | 68 (55.7) [122]         | 33 (70.2)         | 35 (46.7)         | 0.0108  |
| eGFR (mL/min/1.73m <sup>2</sup> )              | 63.7 ± 19.8 [122]       | 59.8 ± 22.0       | 66.1 ± 18.0       | 0.0910  |
| Uric Acid (mg/dL)                              | 5.47 ± 1.55 [121]       | 6.35 ± 1.31       | 4.91 ± 1.43       | <0.0001 |
| UACR (mg/g Cre)                                | 45.7 (19.2–133.8) [122] | 40.5 (18.6–408.6) | 46.7 (19.4–110.2) | 0.2124  |
| <i>Primary cause of CKD</i>                    |                         |                   |                   |         |
| Diabetic nephropathy (%)                       | 11 (9.0) [122]          | 5 (10.6)          | 6 (8.0)           | 0.7477  |
| Chronic glomerulonephritis (%)                 | 69 (56.6) [122]         | 22 (46.8)         | 47 (62.7)         | 0.0855  |
| Nephrosclerosis (%)                            | 18 (14.8) [122]         | 13 (27.7)         | 5 (6.7)           | 0.0029  |
| Others (%)                                     | 24 (19.7) [122]         | 7 (14.9)          | 17 (22.7)         | 0.3542  |
| <i>Concomitant drugs</i>                       |                         |                   |                   |         |
| Antihypertensive agents (%)                    | 76 (62.3) [122]         | 33 (70.2)         | 43 (57.3)         | 0.1532  |
| ARB and or ACEI                                | 59 (48.4) [122]         | 29 (61.7)         | 30 (40.0)         | 0.0196  |
| CCB                                            | 31 (25.4) [122]         | 10 (21.3)         | 21 (28.0)         | 0.4065  |
| Antidiabetic agents (%)                        | 17 (13.9) [122]         | 10 (21.3)         | 7 (9.3)           | 0.1047  |
| Corticosteroids (%)                            | 19 (15.6) [122]         | 9 (19.2)          | 10 (13.3)         | 0.4459  |
| Immunosuppressants (%)                         | 6 (4.9) [122]           | 3 (6.4)           | 3 (4.0)           | 0.6749  |
| Diuretics (%)                                  | 19 (15.6) [122]         | 6 (12.8)          | 13 (17.3)         | 0.6117  |
| <i>Comorbidities</i>                           |                         |                   |                   |         |
| Hypertension (%)                               | 76 (62.3) [122]         | 33 (70.2)         | 43 (57.3)         | 0.1532  |
| HU6 (%)                                        | 44 (36.1) [122]         | 27 (57.5)         | 17 (22.7)         | <0.0001 |
| HU7 (%)                                        | 23 (18.9) [122]         | 16 (34.0)         | 7 (9.3)           | 0.0015  |
| HU8 (%)                                        | 9 (7.4) [122]           | 7 (14.9)          | 2 (2.7)           | 0.0267  |
| Hypertriglyceridemia (%)                       | 69 (56.6) [122]         | 27 (57.5)         | 42 (56.0)         | 0.8753  |
| Hypercholesterolemia (%)                       | 73 (59.8) [122]         | 24 (51.1)         | 49 (65.3)         | 0.1177  |
| Low HDL cholesterol (%)                        | 51 (41.8) [122]         | 21 (44.7)         | 30 (40.0)         | 0.6100  |
| Hyperglycemia (%)                              | 41 (33.6) [122]         | 22 (46.8)         | 19 (25.3)         | 0.0145  |

Continuous variables are expressed as means and standard deviations or as medians (quartile 1–quartile 3). Categorical variables are expressed as n (%). Values of non-missing data are shown in brackets. Abbreviations: *P*, calculated probability; MBP, mean blood pressure; BMI, body mass index; eGFR, estimated glomerular filtration rate; UACR, urine albumin-to-creatinine ratio; Cre, creatinine; CKD, chronic kidney disease; ARB, angiotensin II receptor blocker; ACEI, angiotensin-converting enzyme inhibitor; CCB, calcium-channel blocker; HU6, serum uric acid level ≥6.0 mg/dL or antihyperuricemic agent use; HU7, serum uric acid level ≥7.0 mg/dL or antihyperuricemic agent use; HU8, serum uric acid level ≥8.0 mg/dL or antihyperuricemic agent use; HU (Drug), antihyperuricemic agent use; HDL, high-density lipoprotein.

**Supplementary Table S2.** Results of the multivariable analyses for the risk factors associated with disease progression (i.e., a  $\geq 30\%$  estimated glomerular filtration rate decline or end-stage kidney disease) in men, in women, and in patients without antihyperuricemic agents.

| Variables in three sub-cohort                            | Multivariable Analysis<br>for HU6 |                 | Multivariable Analysis<br>for HU7 |                 | Multivariable Analysis<br>for HU8 |                 |
|----------------------------------------------------------|-----------------------------------|-----------------|-----------------------------------|-----------------|-----------------------------------|-----------------|
|                                                          | Hazard Ratio<br>(95% CI)          | <i>P</i> -Value | Hazard Ratio<br>(95% CI)          | <i>P</i> -Value | Hazard Ratio<br>(95% CI)          | <i>P</i> -Value |
| <b>Men (<i>n</i> = 107)</b>                              |                                   |                 |                                   |                 |                                   |                 |
| eGFR (10 mL/min/1.73 m <sup>2</sup> increments)          | 0.68 (0.57–0.81)                  | <0.0001         | 0.69 (0.58–0.82)                  | <0.0001         | 0.68 (0.56–0.81)                  | <0.0001         |
| UACR (10 mg/g Cre increments)                            | 1.00 (1.00–1.01)                  | 0.0048          | 1.01 (1.00–1.01)                  | 0.0064          | 1.00 (1.00–1.01)                  | 0.0041          |
| HU6 (vs. no)                                             | 1.49 (0.61–4.43)                  | 0.4016          | -                                 | -               | -                                 | -               |
| HU7 (vs. no)                                             | -                                 | -               | 1.48 (0.69–3.45)                  | 0.3239          | -                                 | -               |
| HU8 (vs. no)                                             | -                                 | -               | -                                 | -               | 1.07 (0.56–2.13)                  | 0.8436          |
| Hyperglycemia (vs. no)                                   | 1.60 (0.89–2.92)                  | 0.1183          | 1.67 (0.91–3.07)                  | 0.0957          | 1.60 (0.87–2.94)                  | 0.1290          |
| <b>Women (<i>n</i> = 93)</b>                             |                                   |                 |                                   |                 |                                   |                 |
| eGFR (10 mL/min/1.73 m <sup>2</sup> increments)          | 0.69 (0.56–0.86)                  | 0.0007          | 0.70 (0.56–0.86)                  | 0.0009          | 0.68 (0.55–0.85)                  | 0.0006          |
| UACR (10 mg/g Cre increments)                            | 1.01 (1.00–1.01)                  | 0.1201          | 1.01 (1.00–1.01)                  | 0.1022          | 1.01 (1.00–1.01)                  | 0.1451          |
| HU6 (vs. no)                                             | 2.11 (0.96–4.75)                  | 0.0628          | -                                 | -               | -                                 | -               |
| HU7 (vs. no)                                             | -                                 | -               | 2.18 (1.01–4.69)                  | 0.0467          | -                                 | -               |
| HU8 (vs. no)                                             | -                                 | -               | -                                 | -               | 1.73 (0.77–3.84)                  | 0.1808          |
| Hyperglycemia (vs. no)                                   | 2.44 (1.08–5.18)                  | 0.0326          | 2.27 (1.07–4.84)                  | 0.0332          | 2.16 (0.98–4.47)                  | 0.0571          |
| <b>Without antihyperuricemic agents (<i>n</i> = 122)</b> |                                   |                 |                                   |                 |                                   |                 |
| eGFR (10 mL/min/1.73 m <sup>2</sup> increments)          | 0.84 (0.70–1.00)                  | 0.0534          | 0.84 (0.69–1.00)                  | 0.0529          | 0.84 (0.69–1.01)                  | 0.0629          |
| UACR (10 mg/g Cre increments)                            | 1.01 (1.01–1.02)                  | <0.0001         | 1.01 (1.00–1.01)                  | 0.0006          | 1.01 (1.01–1.02)                  | <0.0001         |
| HU6 (vs. no)                                             | 1.91 (0.98–3.72)                  | 0.0558          | -                                 | -               | -                                 | -               |
| HU7 (vs. no)                                             | -                                 | -               | 2.23 (1.03–4.63)                  | 0.0416          | -                                 | -               |
| HU8 (vs. no)                                             | -                                 | -               | -                                 | -               | 2.74 (0.86–7.37)                  | 0.0850          |
| Hyperglycemia (vs. no)                                   | 1.29 (0.63–2.54)                  | 0.4720          | 1.32 (0.64–2.62)                  | 0.4380          | 1.28 (0.62–2.54)                  | 0.5005          |

Variables with a *P*-Value < 0.05 in Table 2 and hyperuricemia were included in the multivariable model. Abbreviations: CI, confidence interval; *P*, calculated probability; eGFR, estimated glomerular filtration rate; UACR, urine albumin-to-creatinine ratio; HU6, serum uric acid level  $\geq 6.0$  mg/dL or antihyperuricemic agent use; HU7, serum uric acid level  $\geq 7.0$  mg/dL or antihyperuricemic agent use; HU8, serum uric acid level  $\geq 8.0$  mg/dL or antihyperuricemic agent use.
